# Supplementary material for: The alanyl-tRNA synthetase AARS1 moonlights as a lactyltransferase to promote YAP signaling in gastric cancer
Source: PubMed Central journal article supplement (PMC11093599; doi:10.1172/jci174587), 2024-03-21

pan<sup>Klac</sup> for Fig1C

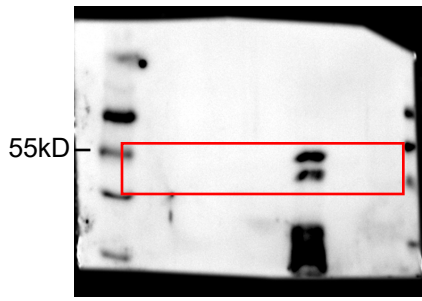

CBB for Fig1C

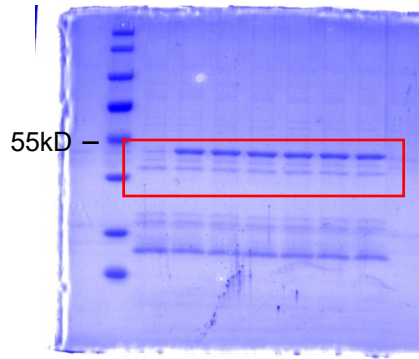

pan<sup>Klac</sup> for Fig1C

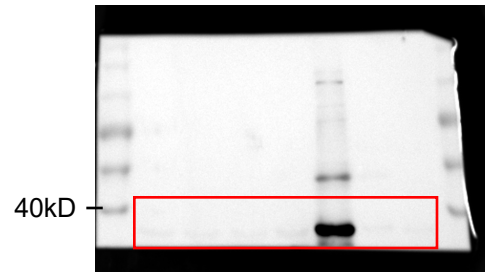

CBB for Fig1C

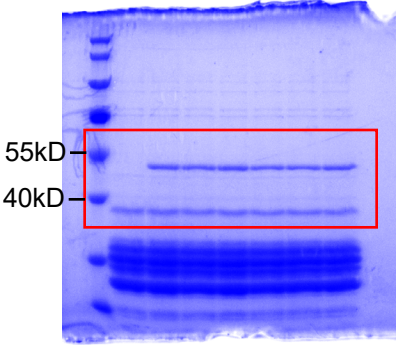

pan<sup>Klac</sup> for Fig1G

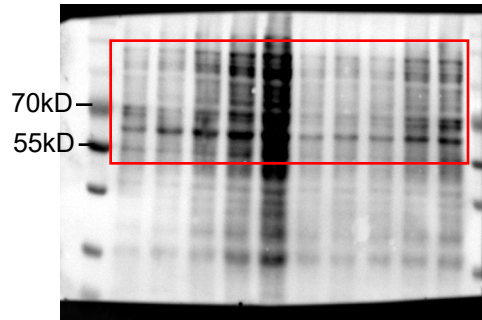

CBB for Fig1G

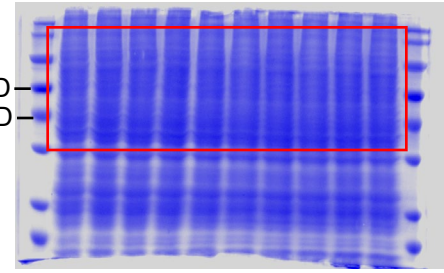

AARS1 for Fig1G

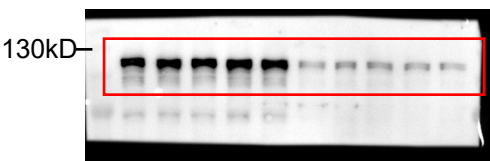

$\beta$ -actin for Fig1G

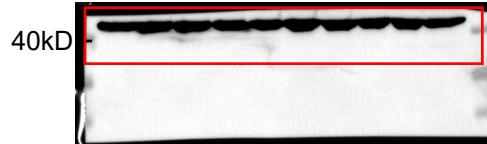

AARS1 for Fig1H

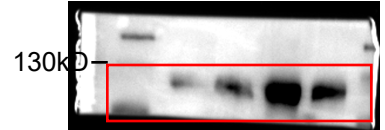

Lamin A/C for Fig1H

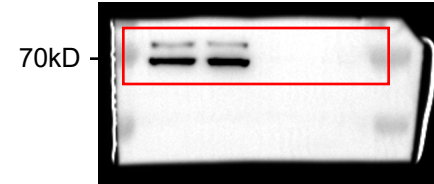

$\alpha$ -Tubulin for Fig1H

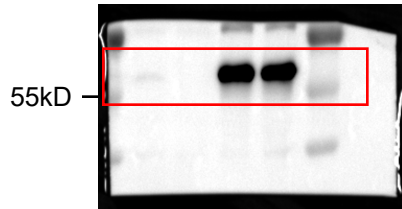

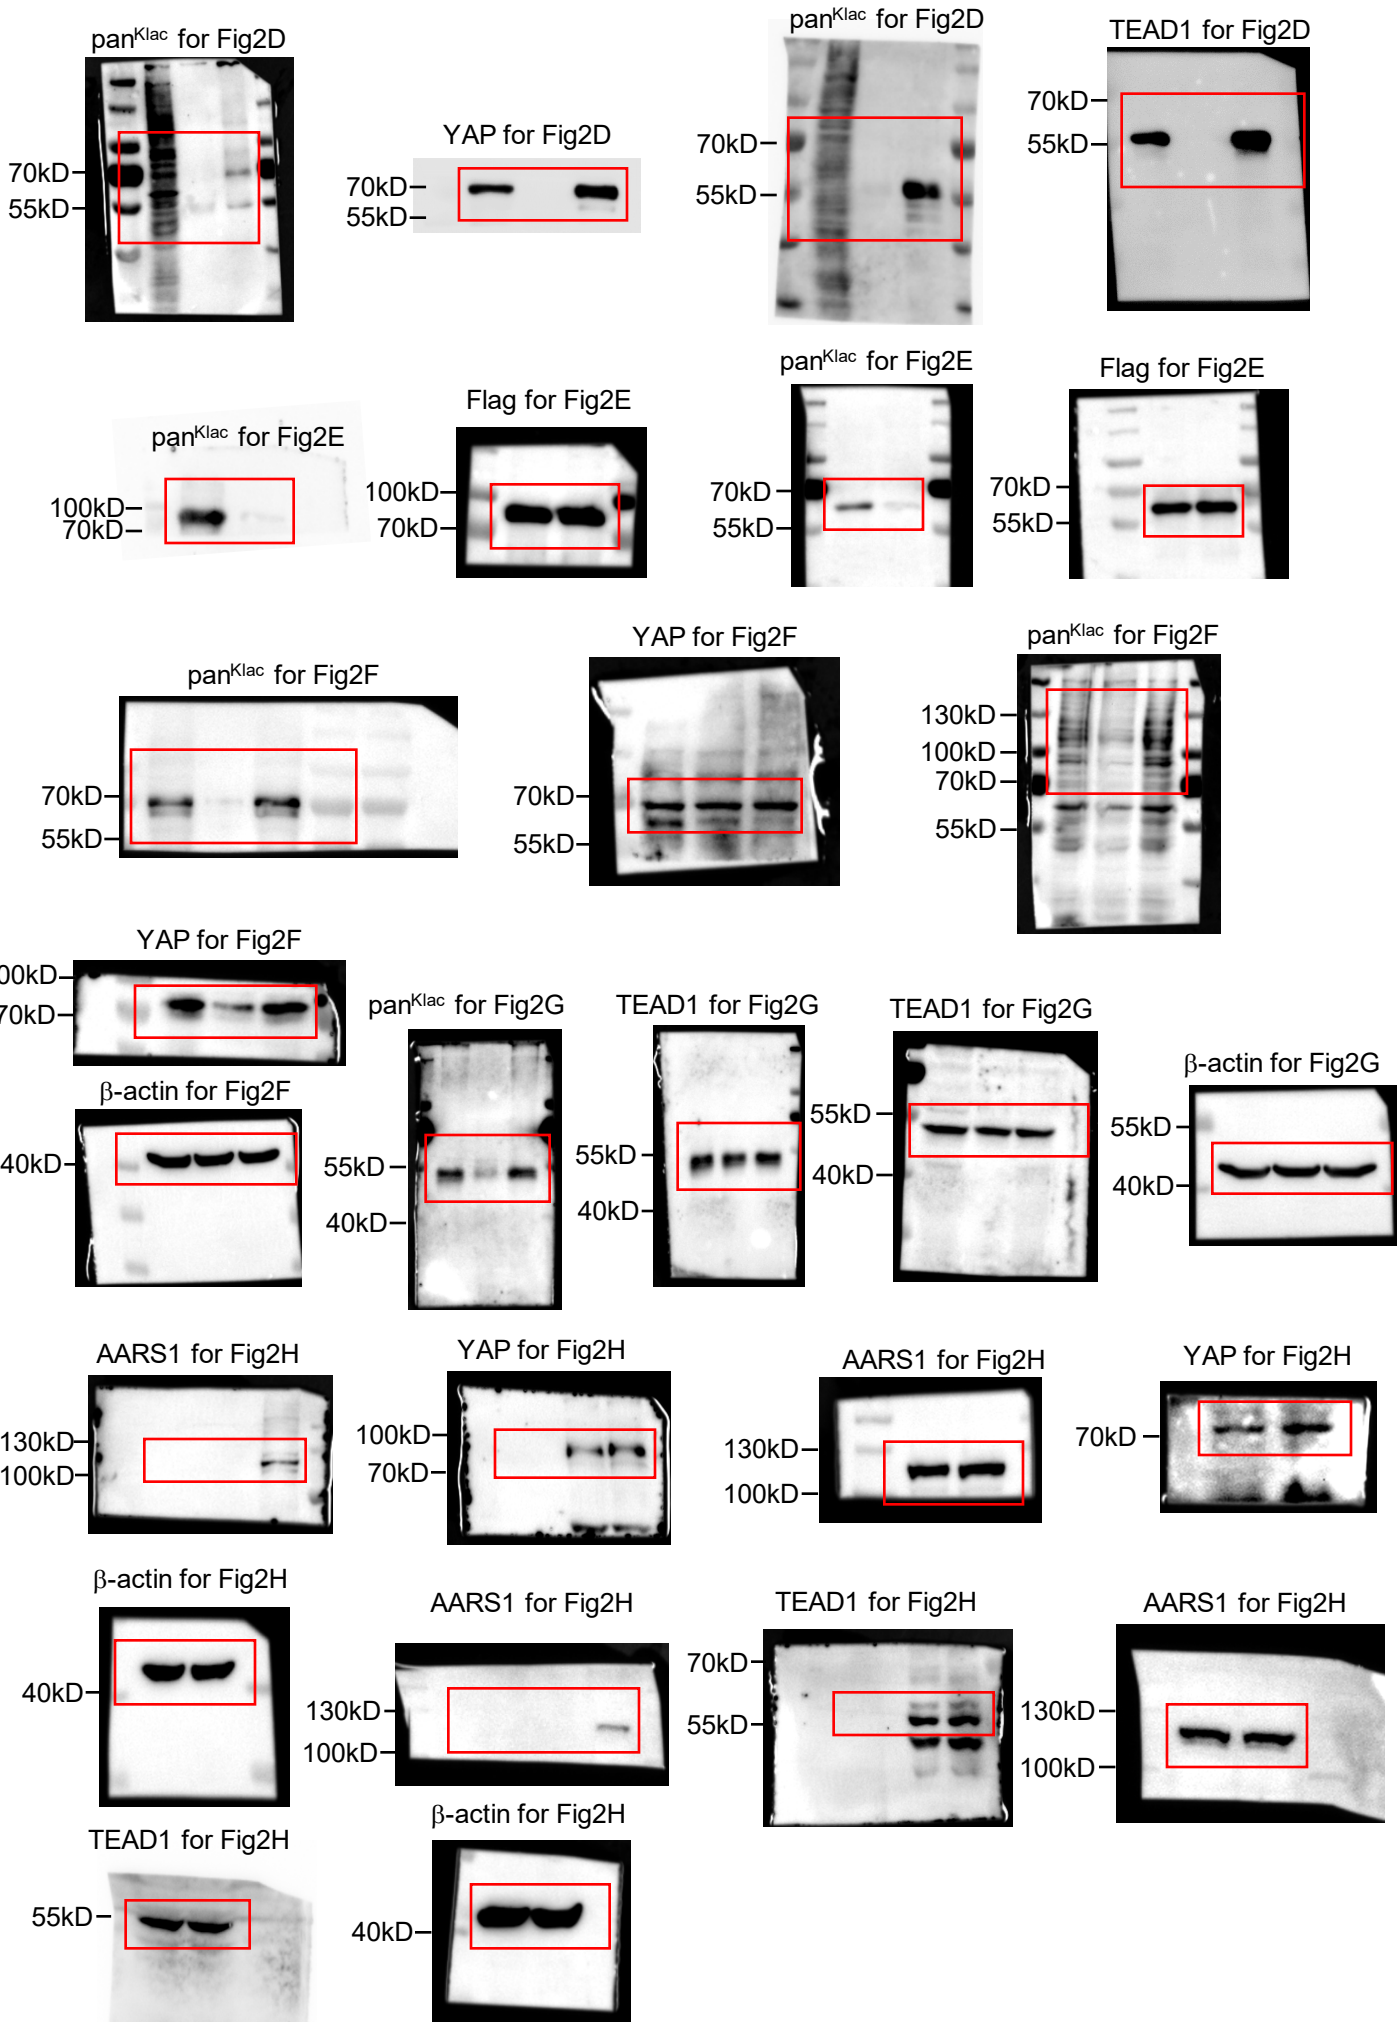

CBB for Fig2I

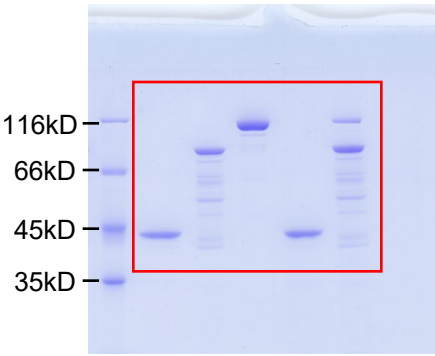

CBB for Fig2I

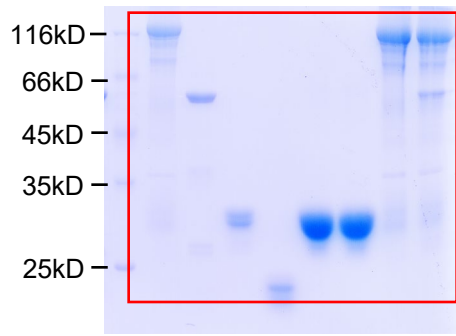

pan<sup>Klac</sup> for Fig2K

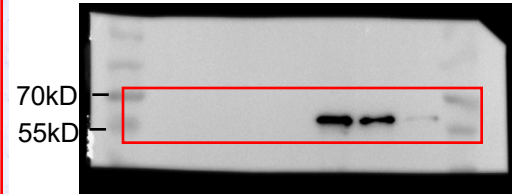

lacYAP<sup>K90</sup> for Fig2L

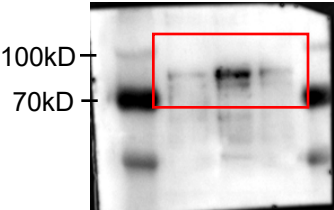

Flag for Fig2L

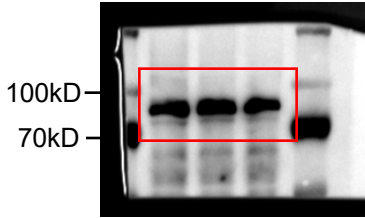

HA for Fig2L

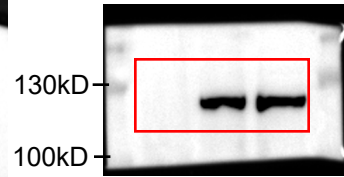

β-actin for Fig2L

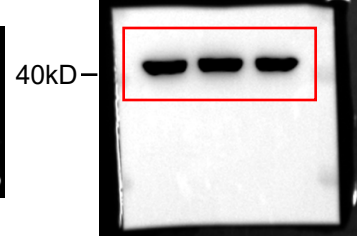

pan<sup>Klac</sup> for Fig2L

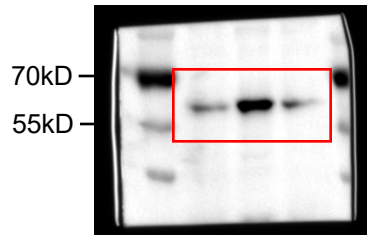

Flag for Fig2L

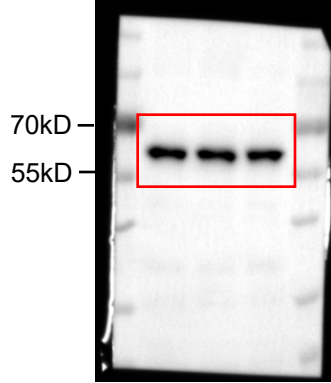

HA for Fig2L

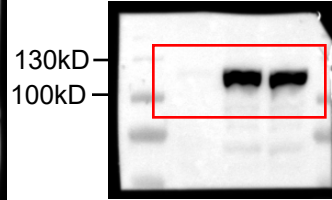

β-actin for Fig2L

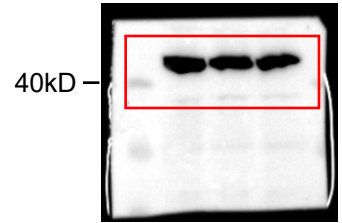

lacYAP<sup>K90</sup> for Fig2M

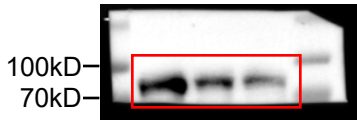

Flag for Fig2M

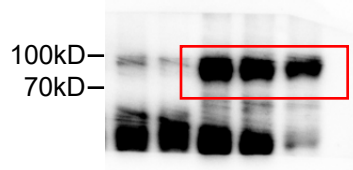

Flag for Fig2M

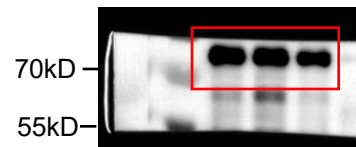

AARS1 for Fig2M

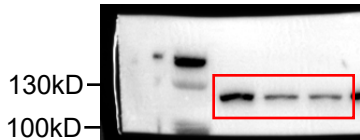

β-actin for Fig2M

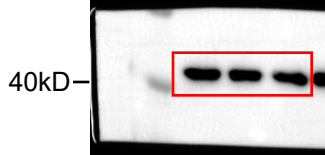

pan<sup>Klac</sup> for Fig2M

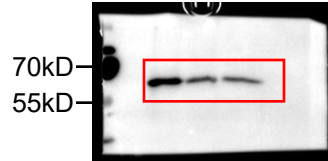

Flag for Fig2M

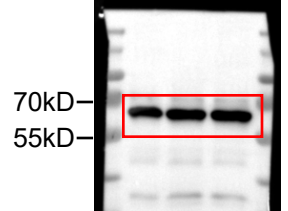

Flag for Fig2M

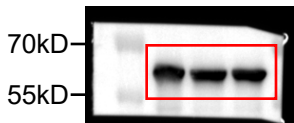

AARS1 for Fig2M

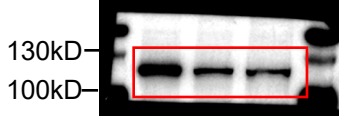

β-actin for Fig2M

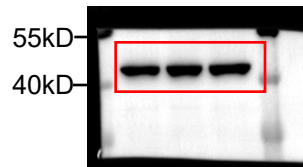

Flag for Fig3B

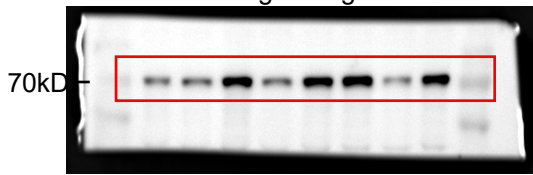

Lamin A/C for Fig3B

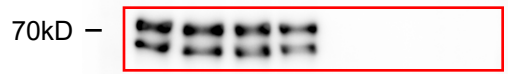

$\alpha$ -Tubulin for Fig3B

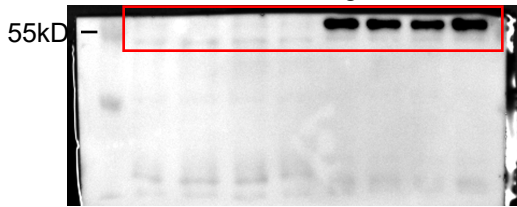

TEAD1 for Fig3C

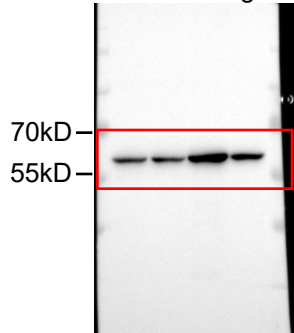

Flag for Fig3C

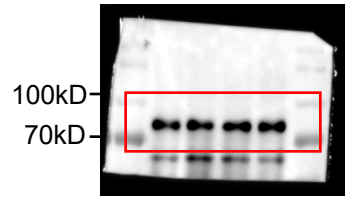

TEAD1 for Fig3C

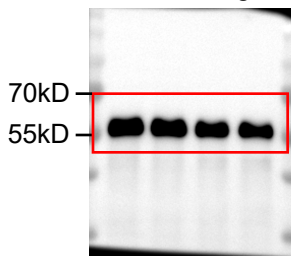

Flag for Fig3C

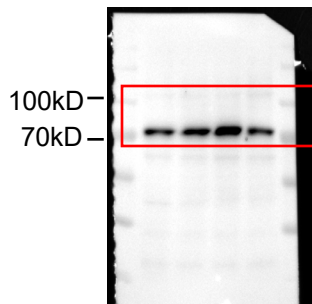

$\beta$ -actin for Fig3C

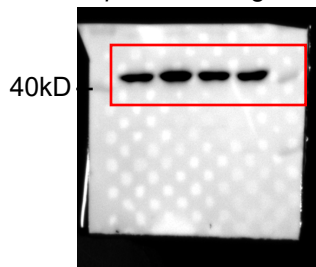

pan<sup>Klac</sup> for Fig3H

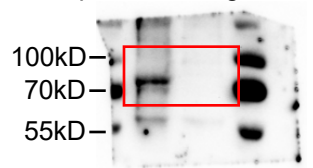

pYAP<sup>S127</sup> for Fig3H

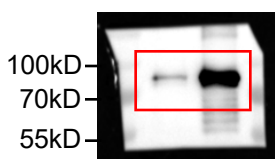

Flag for Fig3H

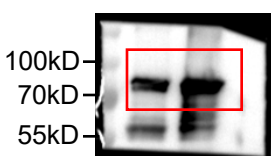

Lamin A/C for Fig3H

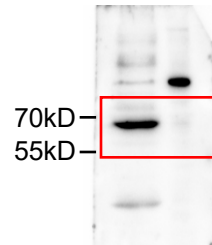

$\alpha$ -Tubulin for Fig3H

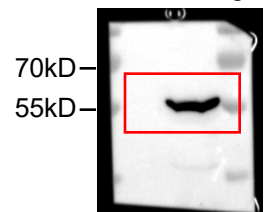

lacYAP<sup>K90</sup> for Fig3I

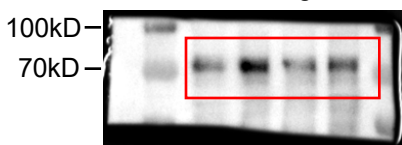

Flag-YAP for Fig3I

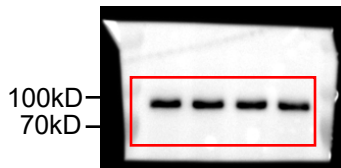

pan<sup>Klac</sup> for Fig3I

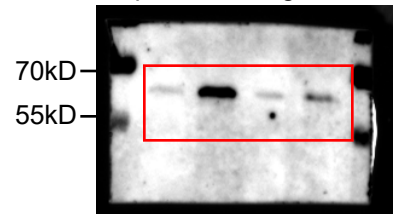

Flag-TEAD1 for Fig3I

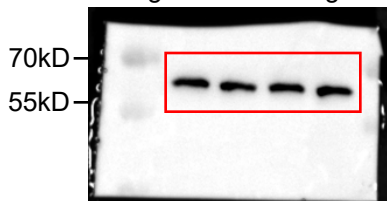



Fig4D

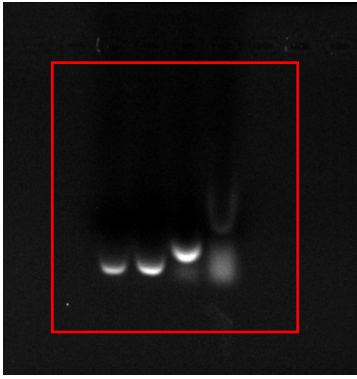

AARS1 for Fig4F

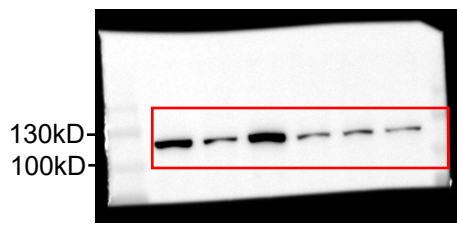

YAP for Fig4F

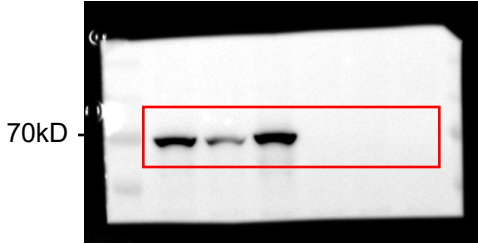

$\beta$ -actin for Fig4F

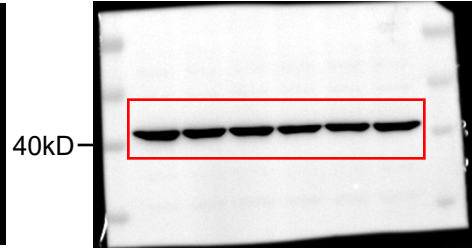

lacYAP<sup>K90</sup> for Fig5B

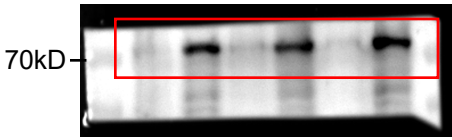

YAP for Fig5B

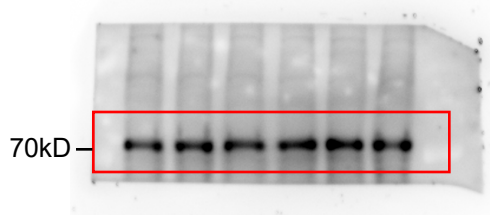

pan<sup>Klac</sup> for Fig5B

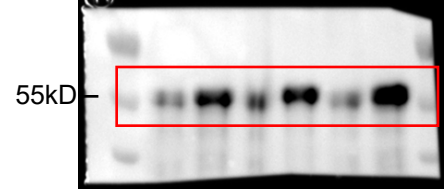

TEAD1 for Fig5B

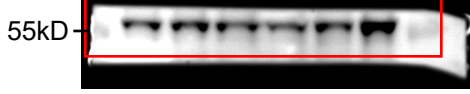

AARS1 for Fig5B

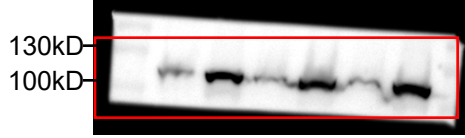

$\beta$ -actin for Fig5B

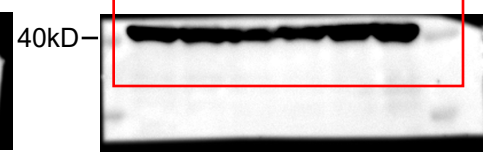

lacYAP<sup>K90</sup> for Fig6D

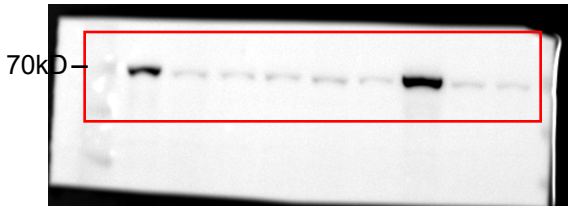

YAP for Fig6D

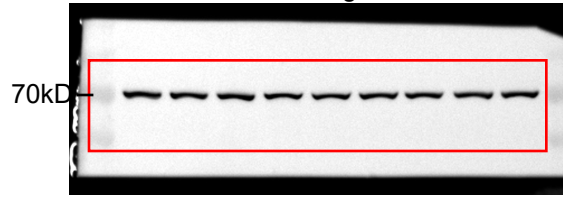

pan<sup>Klac</sup> for Fig6D

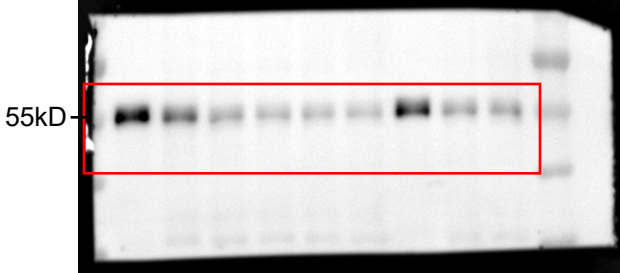

TEAD1 for Fig6D

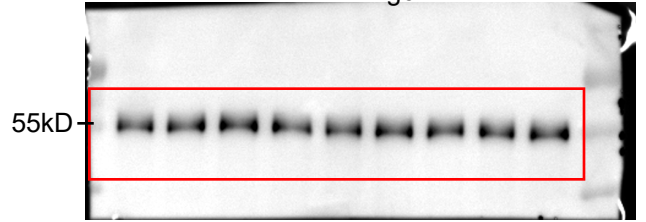

YAP for Fig6D

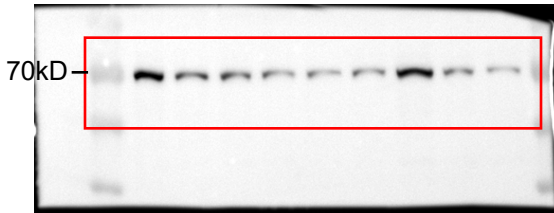

TEAD1 for Fig6D

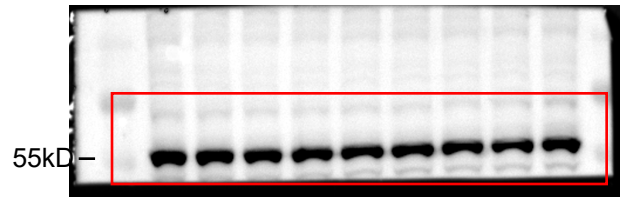

AARS1 for Fig6D

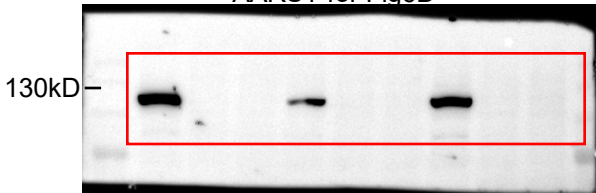

$\beta$ -actin for Fig6D

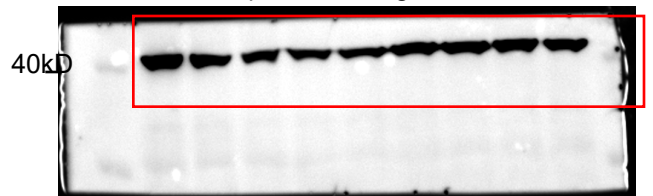

pan<sup>Klac</sup> for Fig7C

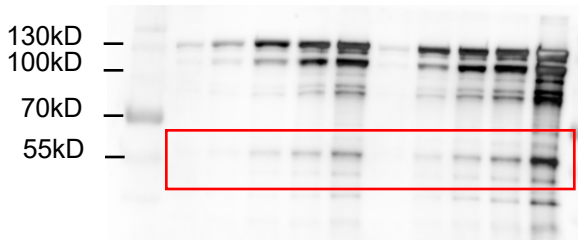

AARS1 for Fig7C

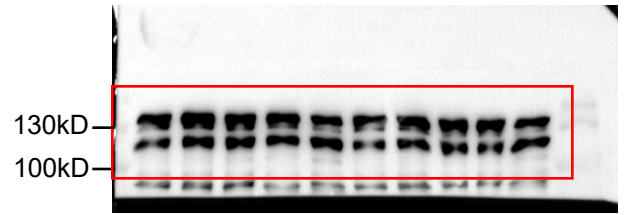

TEAD1 for Fig7C

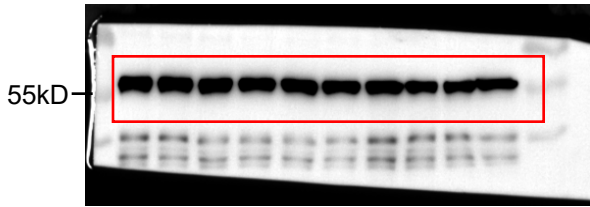

lacYAP<sup>K90</sup> for Fig7D

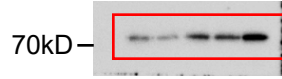

Flag for Fig7D

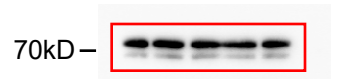

HA for Fig7D

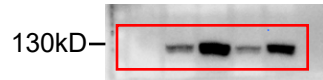

$\beta$ -actin for Fig7D

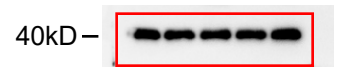



pan<sup>Klac</sup> for Supplemental Fig1A

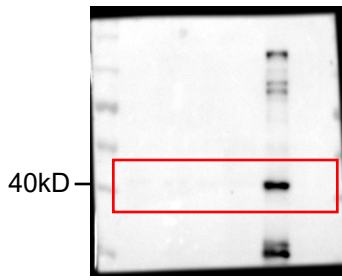

CBB for Supplemental Fig1A

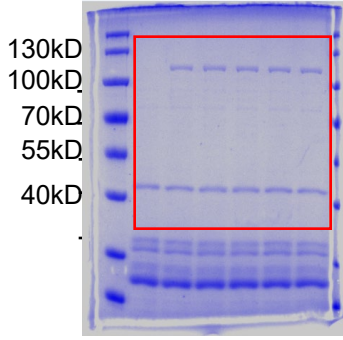

pan<sup>Klac</sup> for Supplemental Fig1A

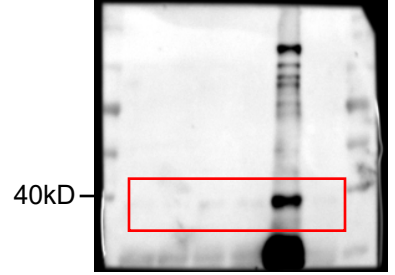

CBB for Supplemental Fig1A

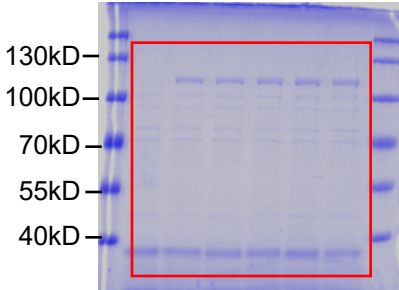

CBB for Supplemental Fig1D

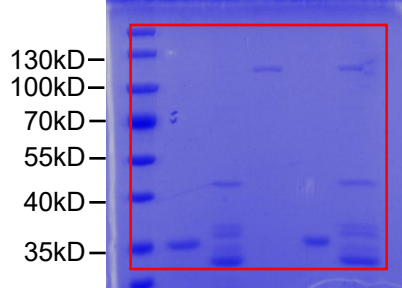

CBB for Supplemental Fig1D

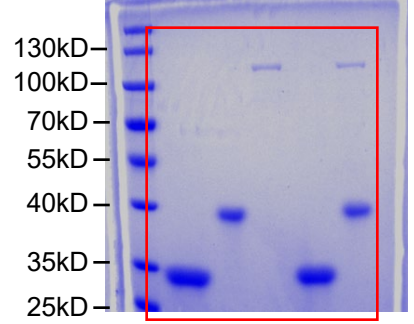

pan<sup>Klac</sup> for Supplemental Fig1F

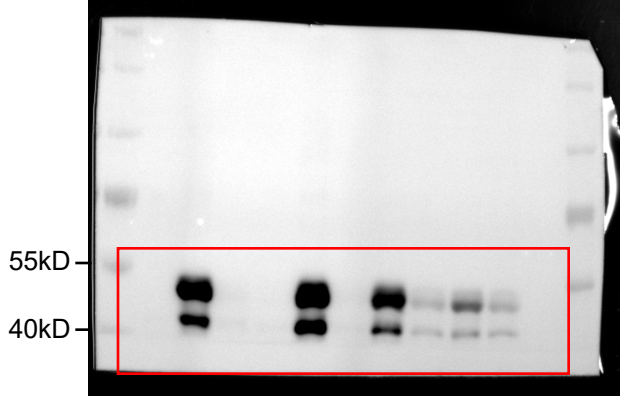

CBB for Supplemental Fig1F

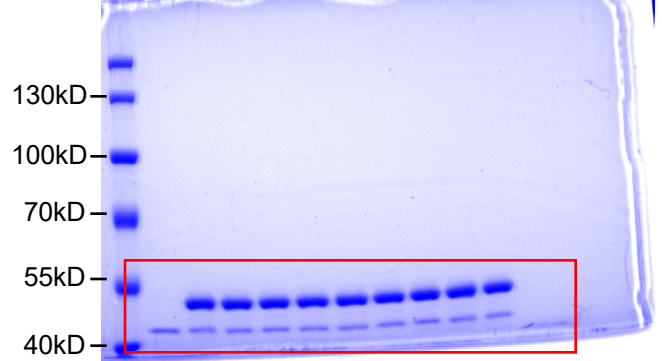

pan<sup>Klac</sup> for Supplemental Fig1G

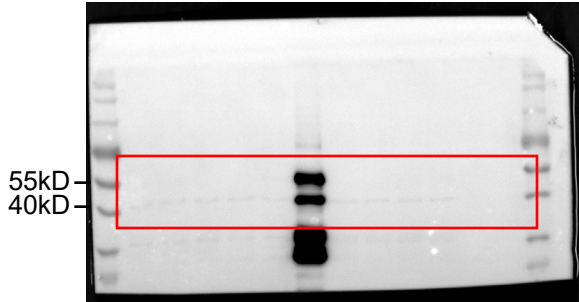

CBB for Supplemental Fig1G

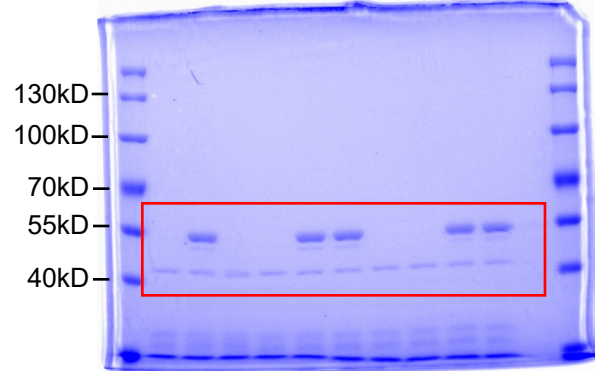

pan<sup>Klac</sup> for Supplemental Fig1H

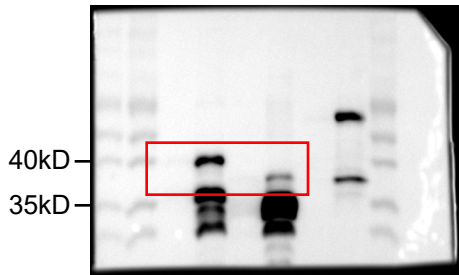

CBB for Supplemental Fig1H

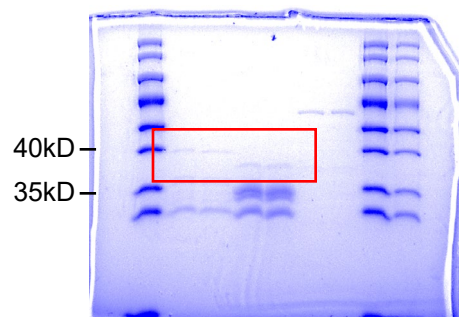

H3K18<sup>lac</sup> for Supplemental Fig1I

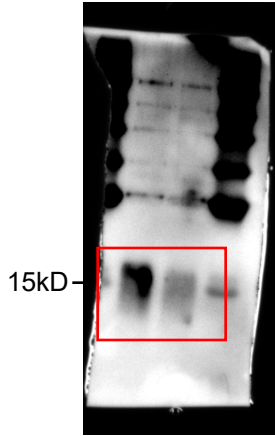

H3 for Supplemental Fig1I

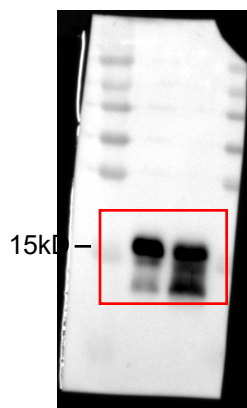

AARS1 for Supplemental Fig1I

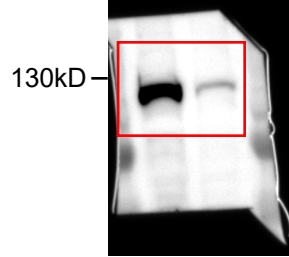

β-actin for Supplemental Fig1I

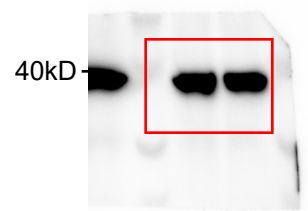

pan<sup>Klac</sup> for Supplemental Fig1J

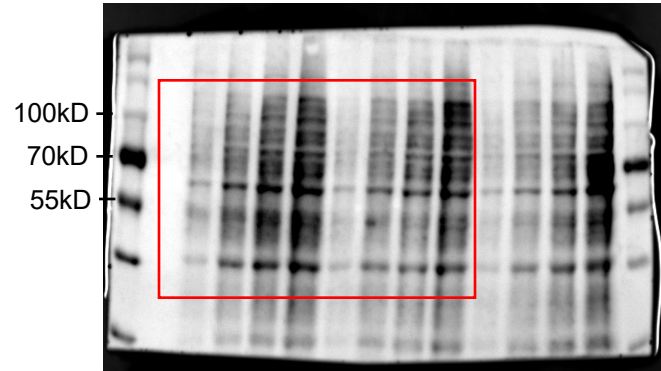

p300 for Supplemental Fig1J

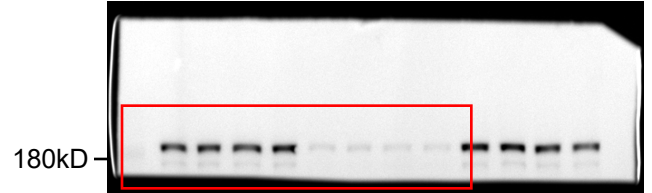

β-actin for Supplemental Fig1J

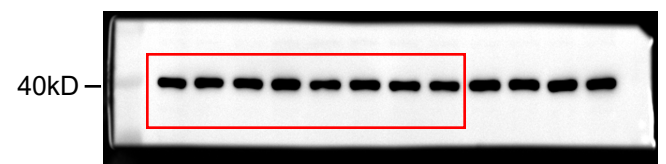

HA for Supplemental Fig1L

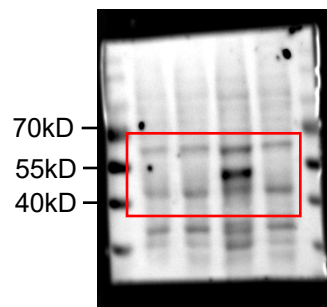

Flag for Supplemental Fig1L

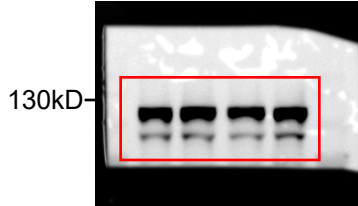

HA for Supplemental Fig1L

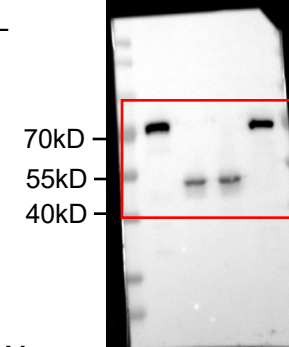

Flag for Supplemental Fig1L

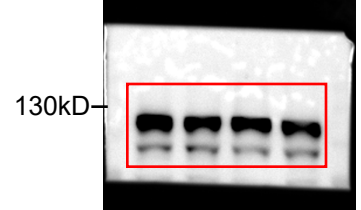

HA for Supplemental Fig1M

β-actin for Supplemental Fig1L

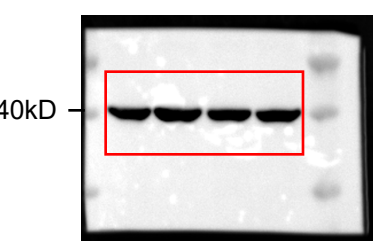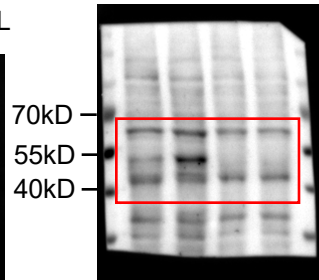

Flag for Supplemental Fig1M

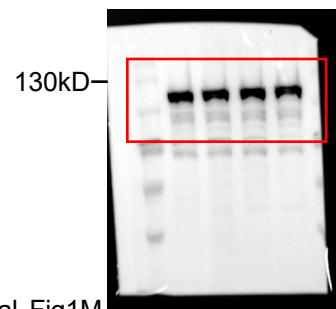

HA for Supplemental Fig1M

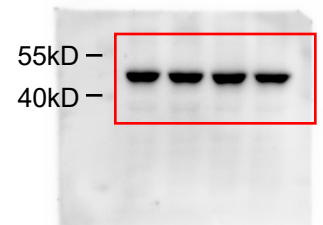

Flag for Supplemental Fig1M

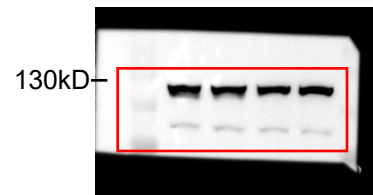

β-actin for Supplemental Fig1M

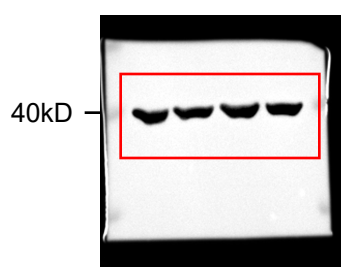

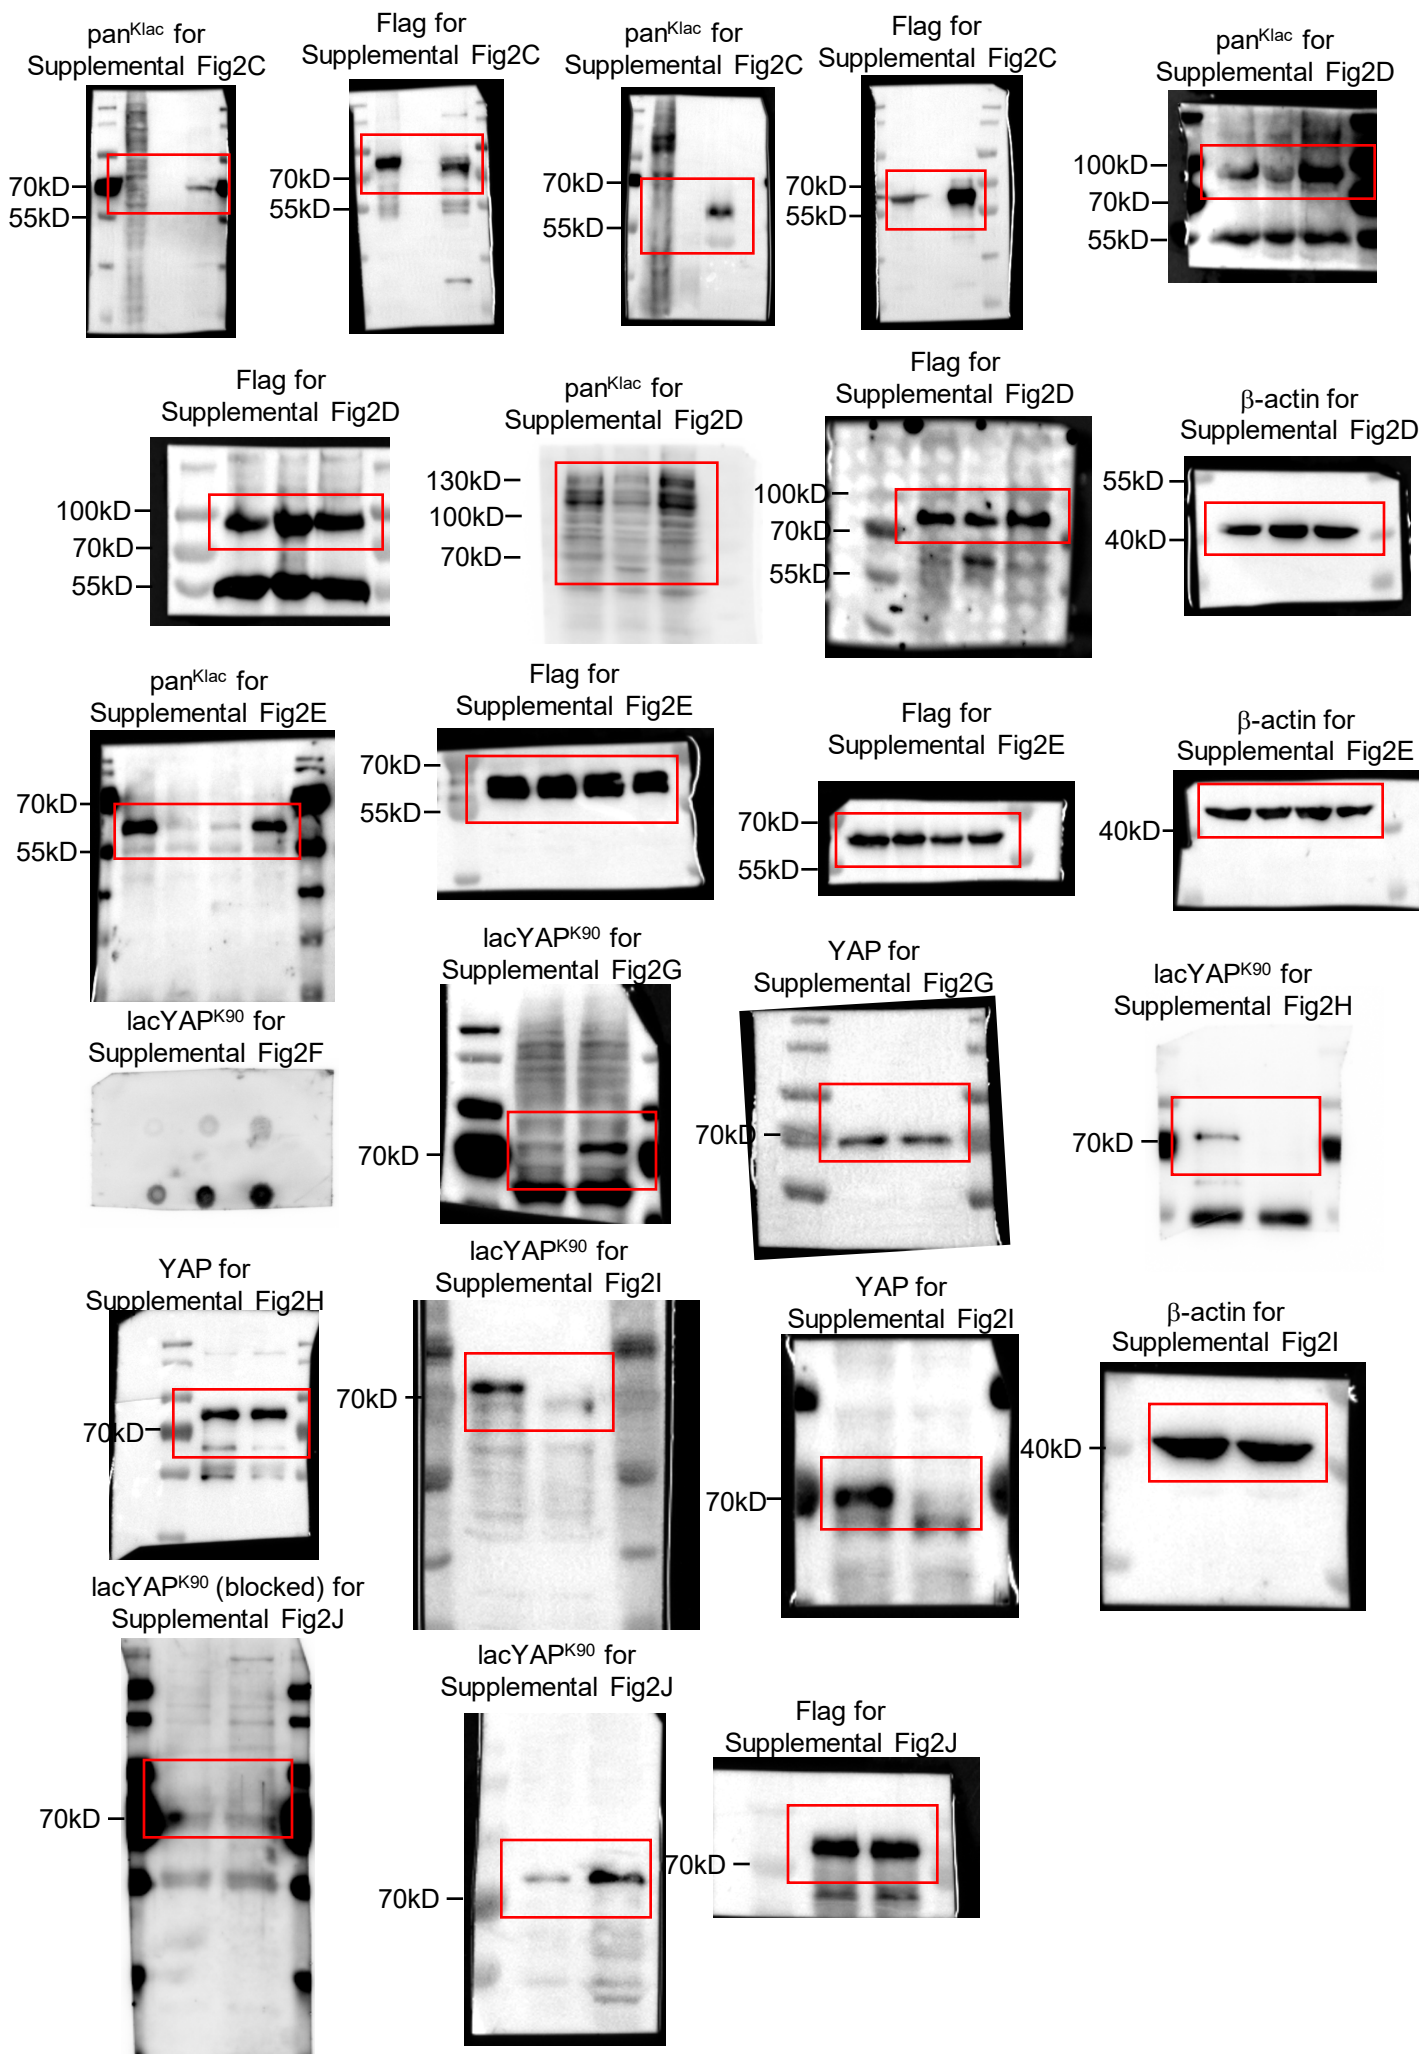



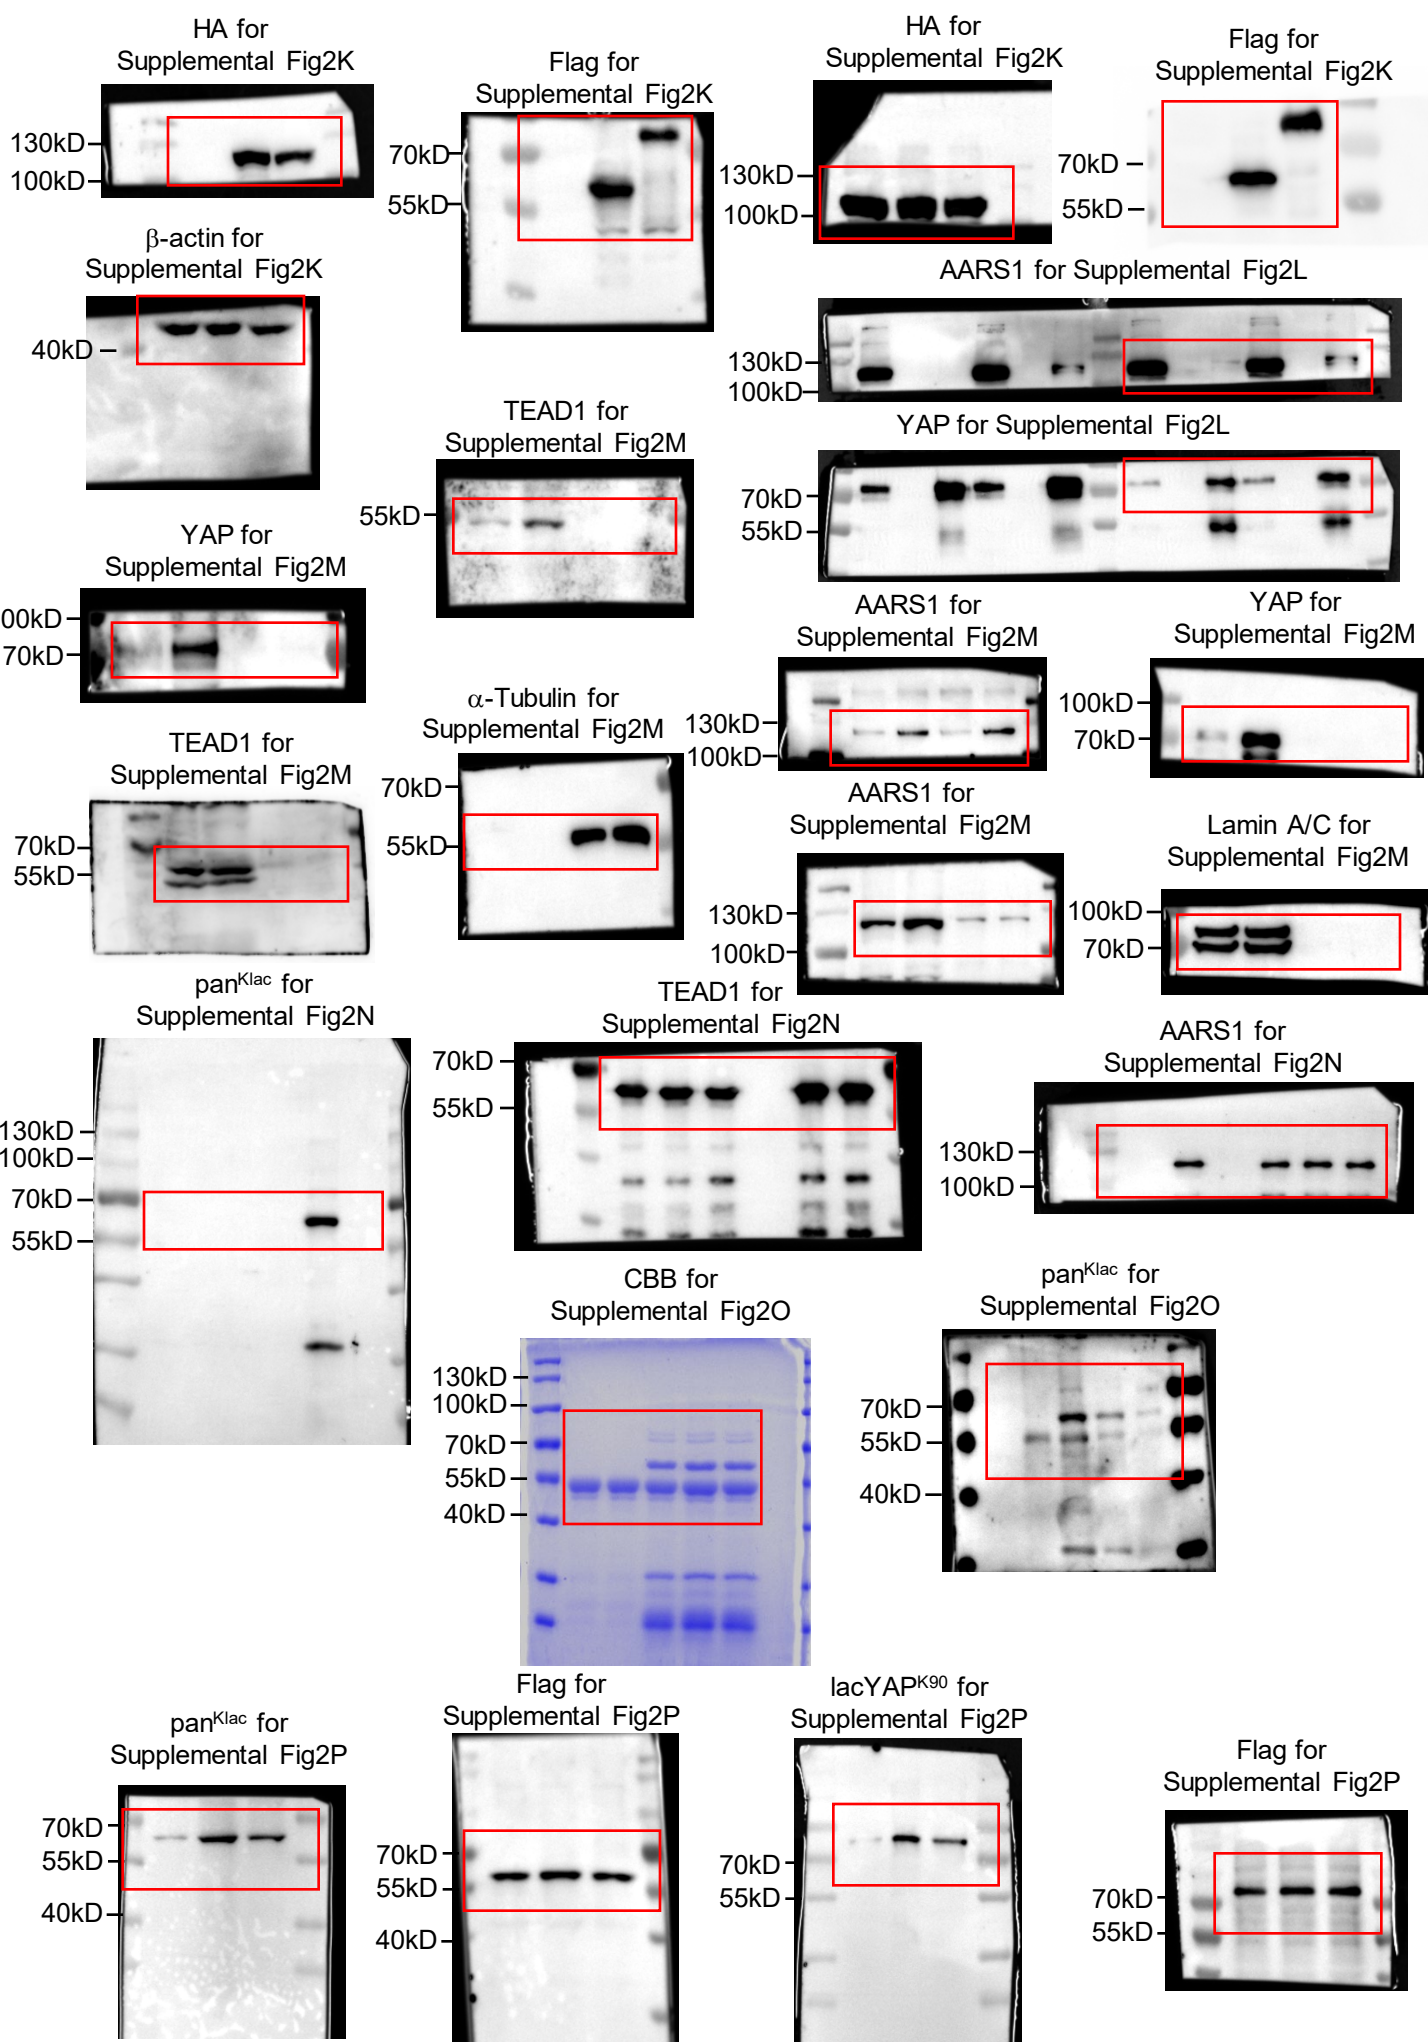



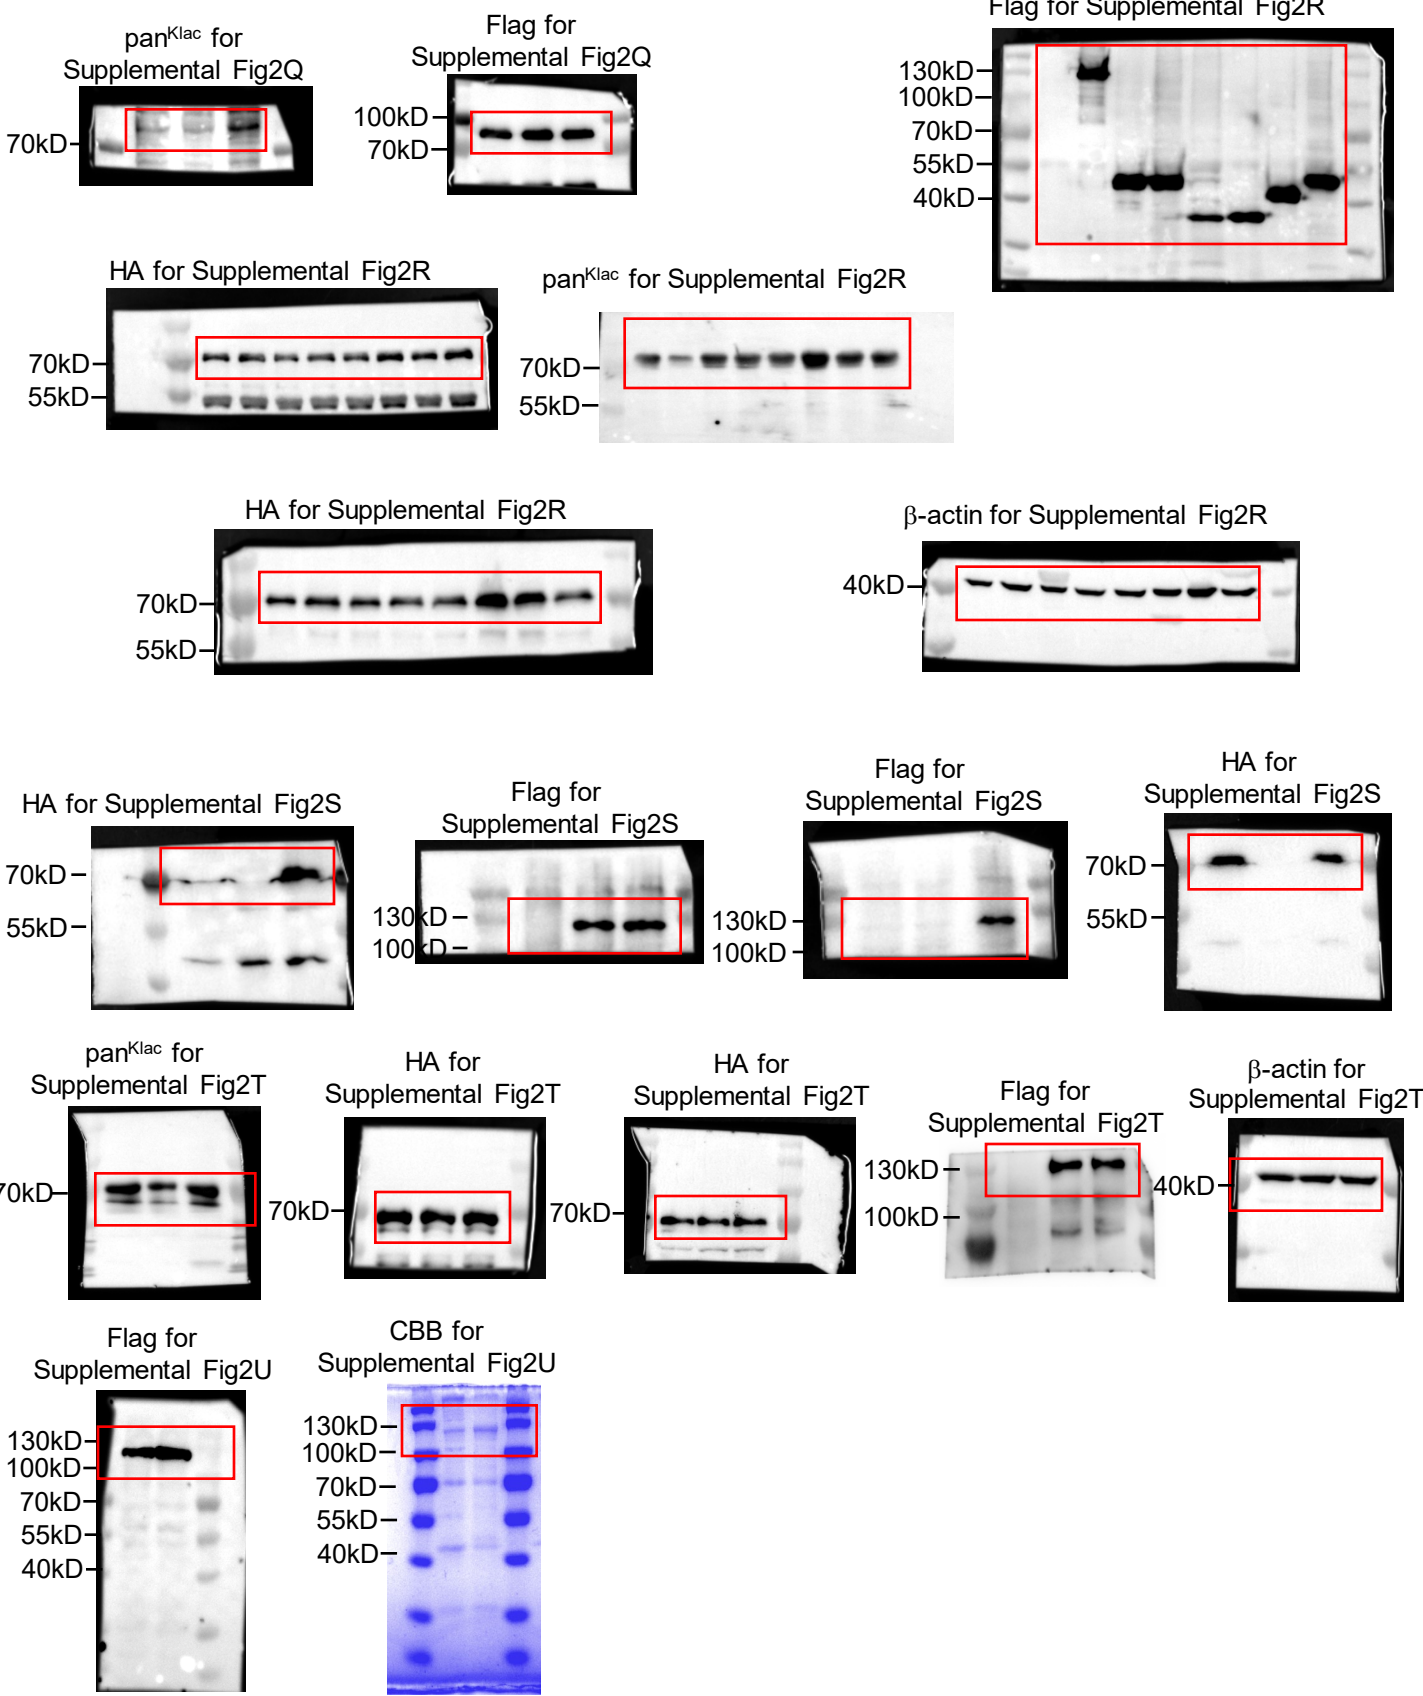

HA for Supplemental Fig3B

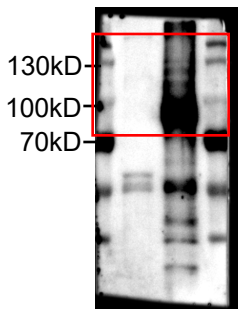

lacYAP<sup>K90</sup> for Supplemental Fig3B

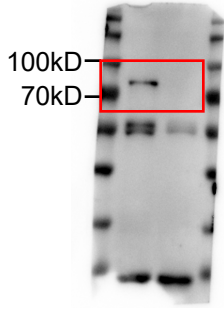

Flag for Supplemental Fig3B

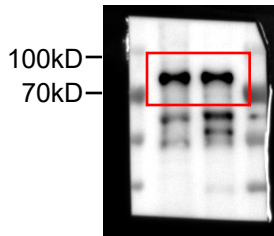

Lamin A/C for Supplemental Fig3B

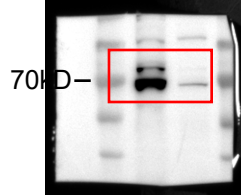

$\alpha$ -Tubulin for Supplemental Fig3B

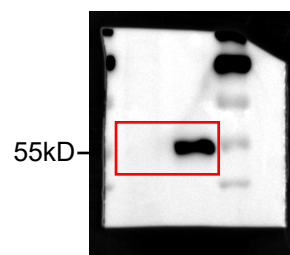

HA for Supplemental Fig3B

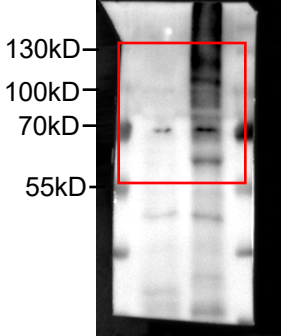

pan<sup>Klac</sup> for Supplemental Fig3B

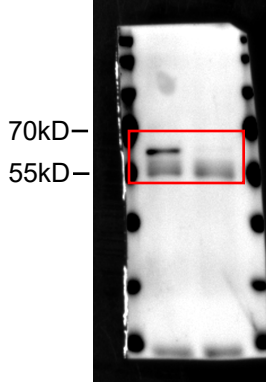

Flag for Supplemental Fig3B

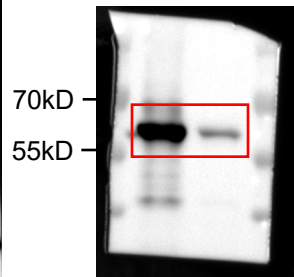

Lamin A/C for Supplemental Fig3B

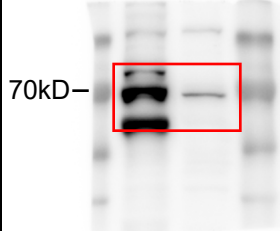

$\alpha$ -Tubulin for Supplemental Fig3B

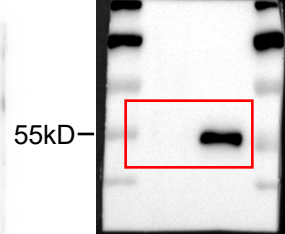

HA for Supplemental Fig3C

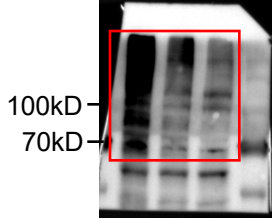

pan<sup>Klac</sup> for Supplemental Fig3C

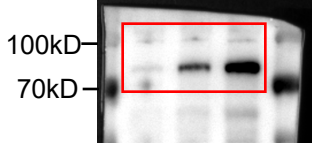

Flag for Supplemental Fig3C

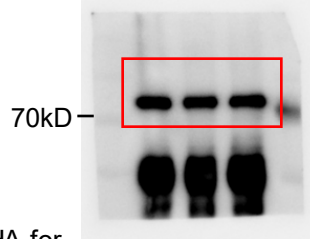

Flag for Supplemental Fig3C

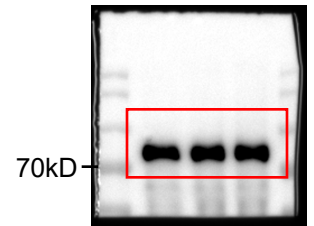

HA for Supplemental Fig3C

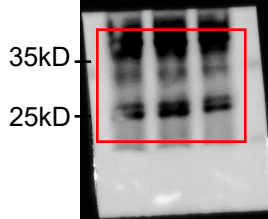

$\beta$ -actin for Supplemental Fig3C

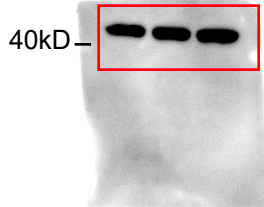

HA for Supplemental Fig3C

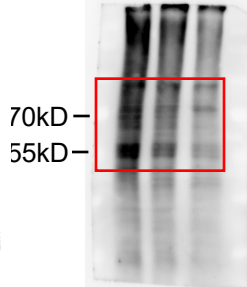

lacYAP<sup>K90</sup> for Supplemental Fig3C

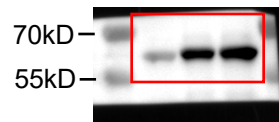

Flag for Supplemental Fig3C

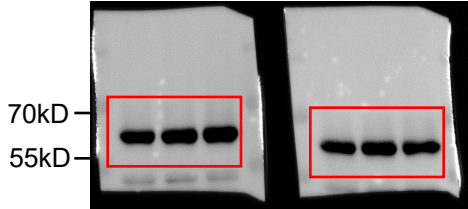

HA for Supplemental Fig3C

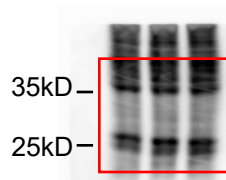

$\beta$ -actin for Supplemental Fig3C

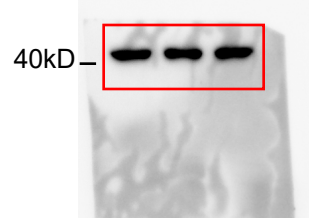

HA for Supplemental Fig3D

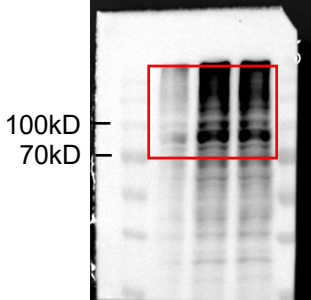

lacYAP<sup>K90</sup> for Supplemental Fig3D

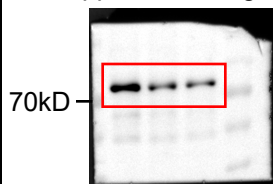

Flag for Supplemental Fig3D

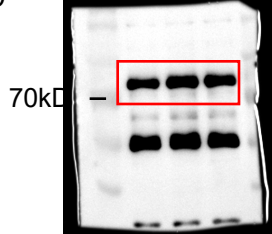

AARS1 for Supplemental Fig3D

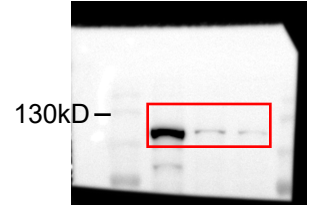

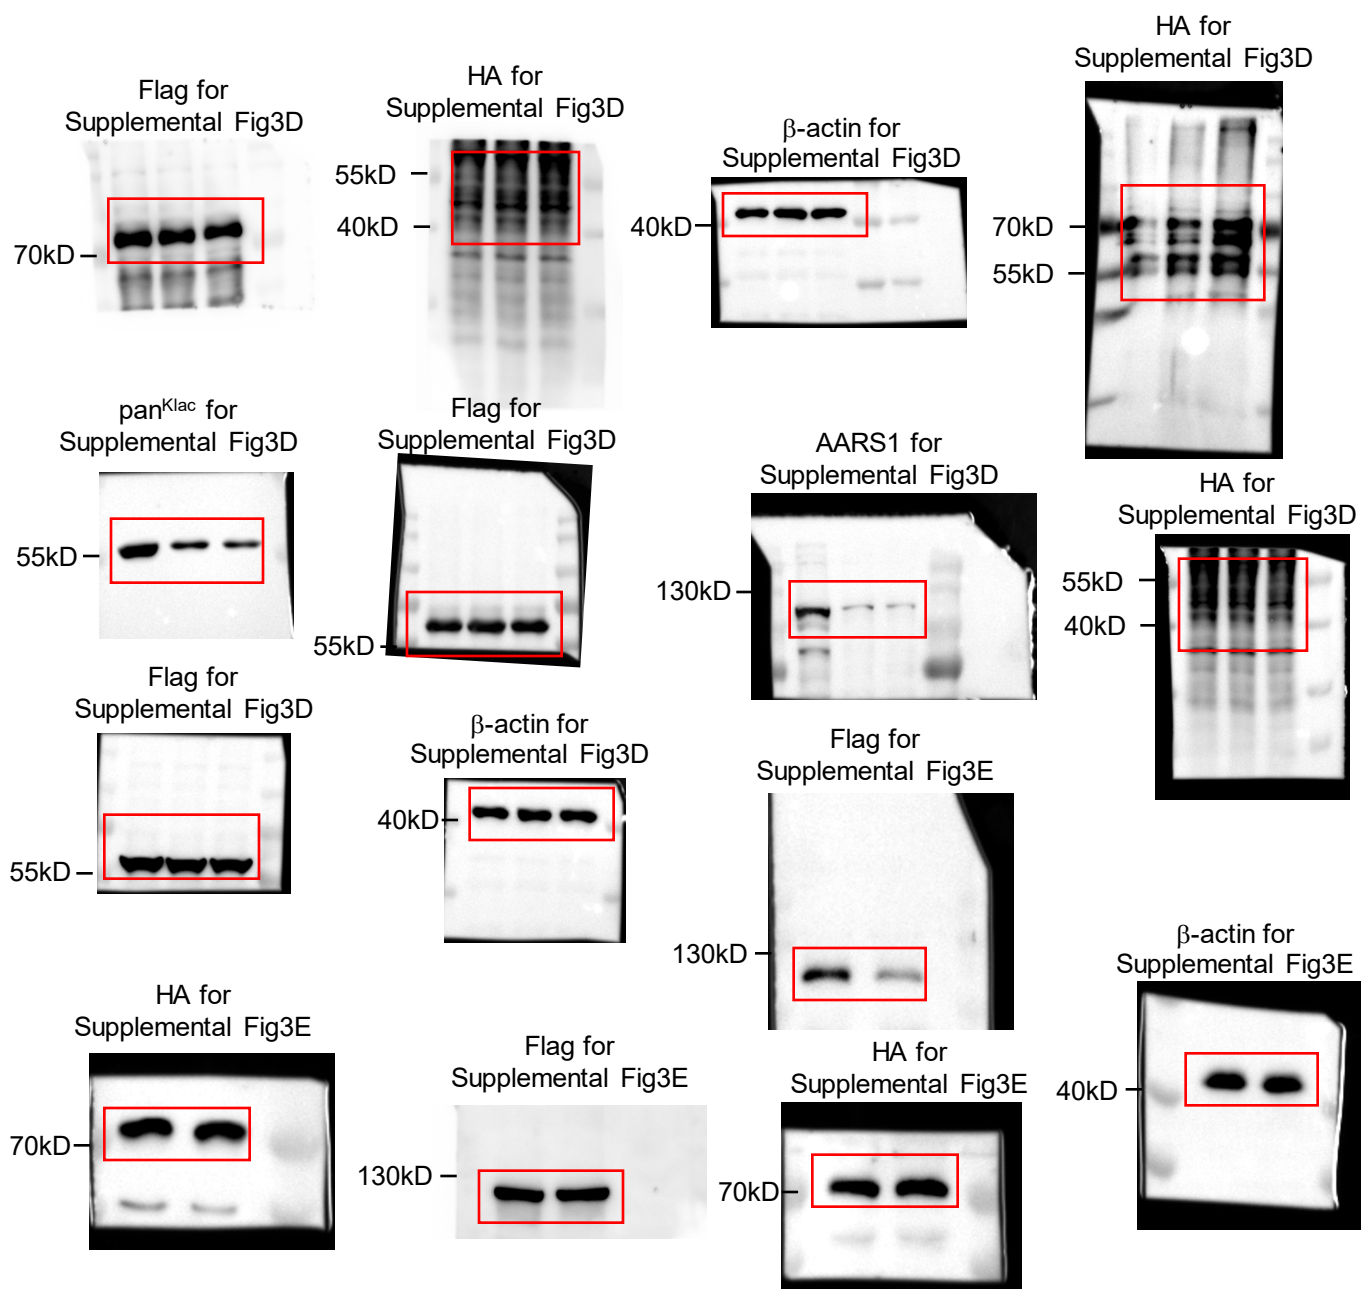

Flag for  
Supplemental Fig 4C

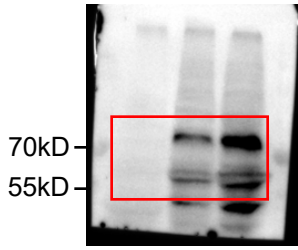

$\beta$ -actin for  
Supplemental Fig 4C

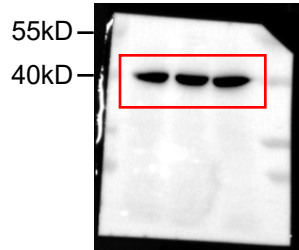



AARS1 for Supplemental Fig 5C

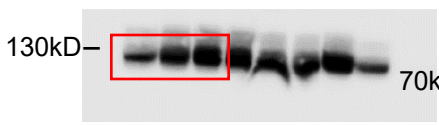

YAP for Supplemental Fig 5C

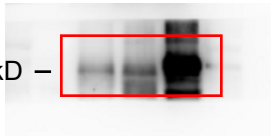

TEAD1 for Supplemental Fig 5C

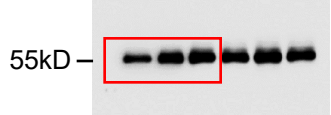

$\beta$ -actin for Supplemental Fig 5C

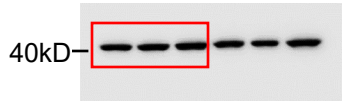

AARS1 for Supplemental Fig 5B

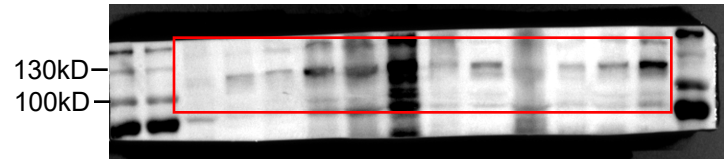

$\beta$ -actin for Supplemental Fig 5B

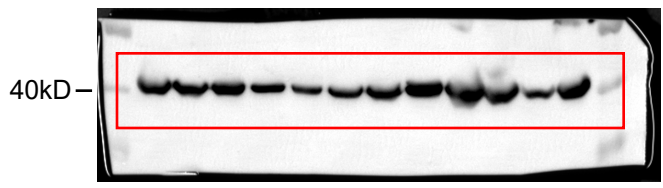

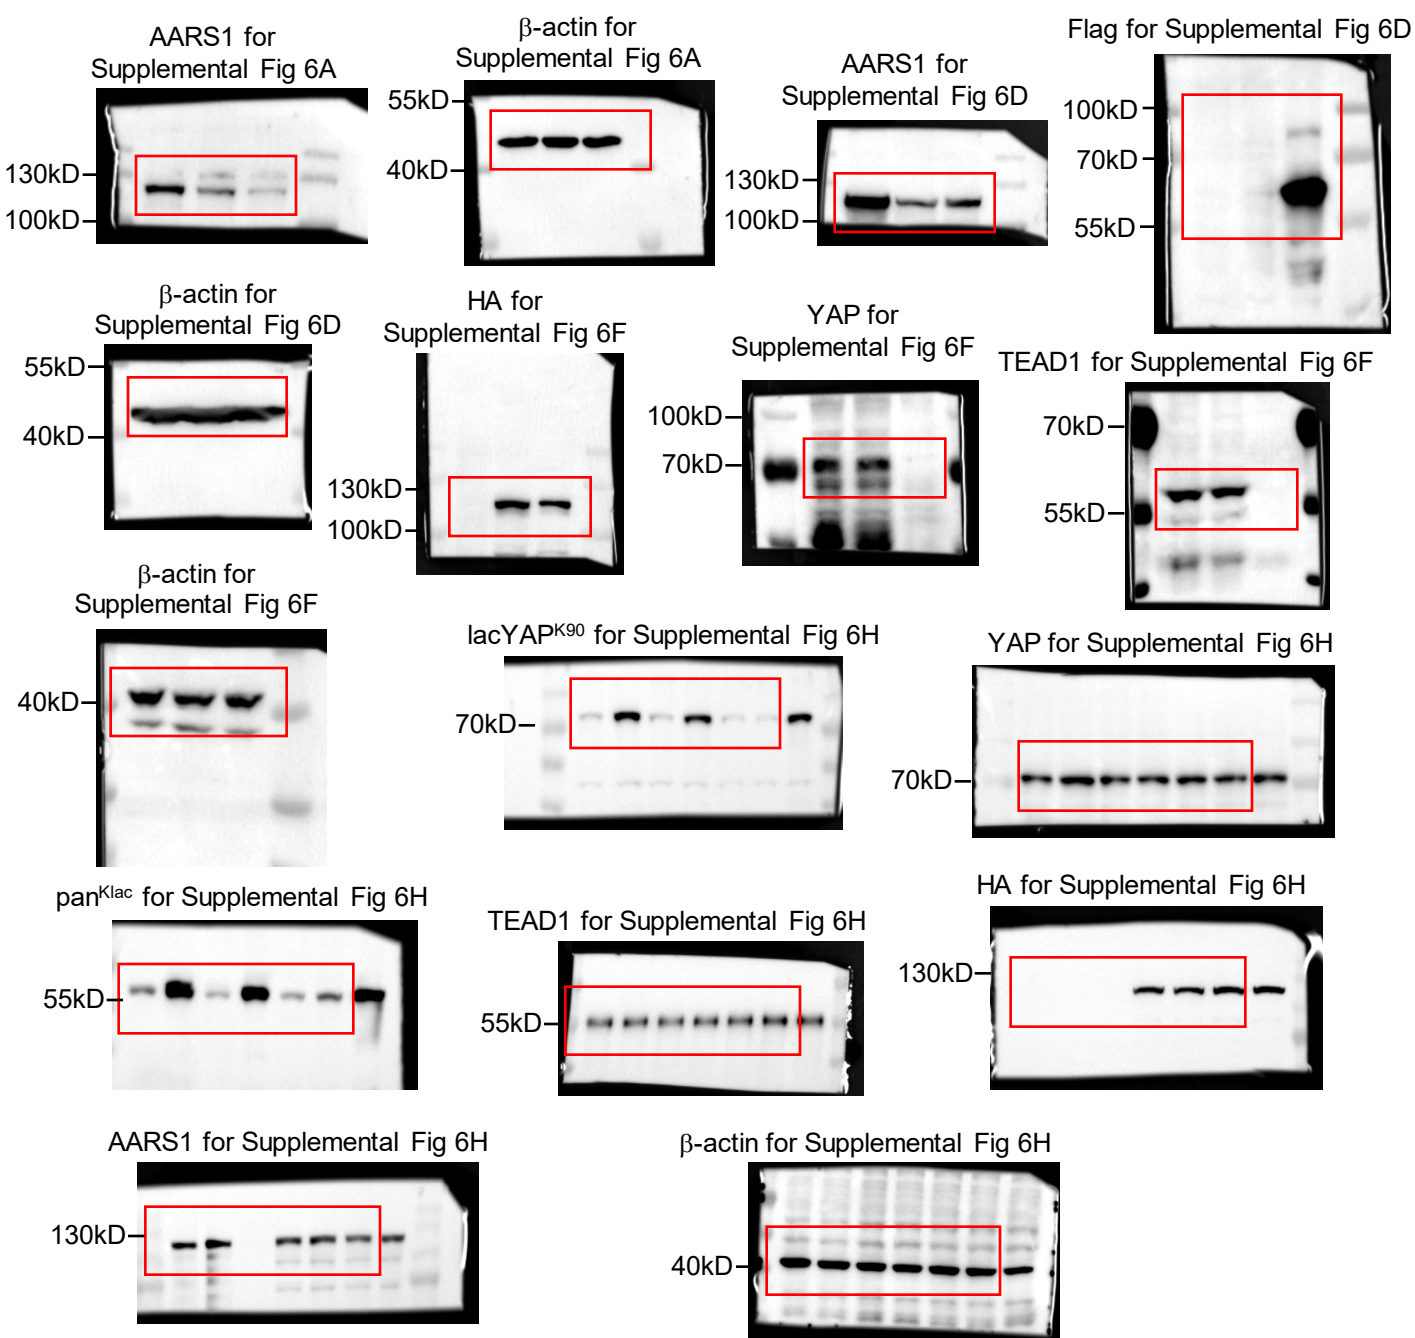

HA for Supplemental Fig7

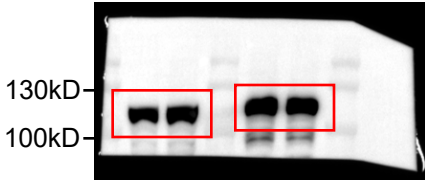

Flag for Supplemental Fig7

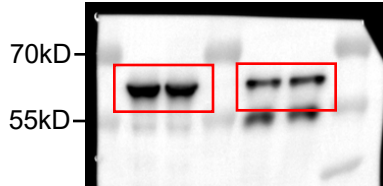

$\beta$ -actin for Supplemental Fig7

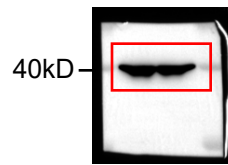

HA for Supplemental Fig7

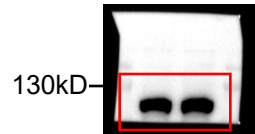

Flag for Supplemental Fig7

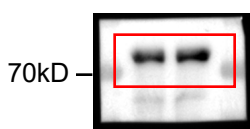

HA for Supplemental Fig7

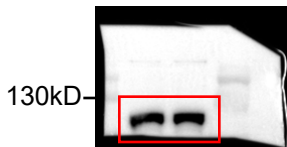

Flag for Supplemental Fig7

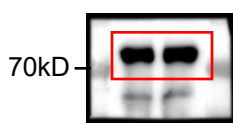

$\beta$ -actin for Supplemental Fig7

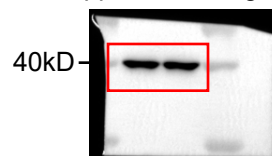

Supplement: jci-134-174587-s263.pdf [file jci-134-174587-s263.pdf]
